# Supplementary material for: A sulfur(vi) fluoride exchange click chemistry approach towards main chain liquid crystal polymers bearing sulfate ester groups
Source: Royal Society of Chemistry journal article supplement (doi:10.1039/c9py00577c), 2019-01-01

## Supporting Information

### **A Sulfur(VI) Fluoride Exchange Click Chemistry Approach towards Main Chain Liquid Crystal Polymers Bearing Sulfate Ester Groups**

Meng Wang, Hong-Sheng Jin, Xu-Man Chen, Bao-Ping Lin, Hong Yang\*

*School of Chemistry and Chemical Engineering, Jiangsu Province Hi-Tech Key  
Laboratory for Bio-medical Research, Institute of Advanced Materials, Southeast  
University, Nanjing, 211189, China*

\*Corresponding author: Hong Yang, Tel 86 25 52090620, Fax 86 25 52090616, *E-mail Addresses:* yangh@seu.edu.cn (H. Yang).

## GENERAL CONSIDERATIONS.

### Materials and Instruments

Dicyclohexylcarbodiimide (DCC), dimethylaminopyridine (DMAP), 1,8-diazabicyclo[5.4.0]undec-7-ene (DBU), triazabicyclodecene (TBD) and 2-*tert*-butylimino-2-diethylamino-1,3-dimethylperhydro-1,3,2-diaza-phosphorine (BEMP) were purchased from Aladdin (Shanghai) Inc. 1,2,4-Trichlorobenzene (TCB) and *tert*-butyldimethylsilyl chloride (TBS-Cl) were obtained from Macklin Inc. Sulfuryl fluoride gas (SO<sub>2</sub>F<sub>2</sub>) was obtained from Shangfluoro Inc.

A Sigma 2K 15 centrifuge was used for isolation of polymers after precipitation. All flash chromatography were performed using Macherey-Nagel MN Kieselgel 60 (0.063-1.2 mm). All <sup>1</sup>H NMR, <sup>13</sup>C NMR and <sup>19</sup>F NMR spectra were obtained using a Bruker HD 600MHz spectrometer or a Bruker HW300 MHz spectrometer at 295 K and recorded in CDCl<sub>3</sub> or 1,2-dichlorobenzene-d<sub>4</sub>. Gel permeation chromatography (GPC) was performed on an PL-GPC220 high pressure liquid chromatography (HPLC), equipped with an HP 1047A refractive index detector and a Plgel MIXED-C 300-7.5 mm column (packed with 5 μm particles). The column packing allowed the separation of polymers over a wide molecular weight range of 200-3000000. TCB was used as the eluent at a flow rate of 1 mL/min at 150 °C. Polystyrene standards were used as the references. Differential scanning calorimetry (DSC) spectra were recorded on a TA Instruments Q20 instrument (New Castle, DE) under nitrogen purge at a heating rate of 10 K/min from 0 °C to +250 °C. Thermogravimetric analysis (TGA) was performed on a Perkin-Elmer TGA7.

Polarized optical microscopy (POM) observations of the liquid crystalline (LC) textures of all the monomers and polymers were performed on an Olympus BX53P microscope with a Mettler PF82HT hot stage. The images were captured by using a Microvision MV-DC200 digital camera with a Phenix Phmias 2008 Cs Ver2.2 software. X-ray scattering experiments were performed with a high-flux small angle X-ray scattering instrument (SAXSess, Anton Paar) equipped with a Kratky block-collimation system and a temperature control unit (Anton Paar TCS300). At each single steady temperature, both small angle X-ray scattering (SAXS) and wide-angle X-ray scattering (WAXS) were simultaneously recorded on an imaging-plate (IP) which was extended to high-angle range (the *q* range covered by the IP was from 0.06

$\text{nm}^{-1}$  to  $29 \text{ nm}^{-1}$ ,  $q = 4\pi(\sin\theta)/\lambda$ , where the wavelength  $\lambda$  is  $0.1542 \text{ nm}$  of  $\text{Cu K}\alpha$  radiation and  $2\theta$  is the scattering angle) at  $40 \text{ kV}$  and  $40 \text{ mA}$  for  $30 \text{ min}$ .

### Synthesis of monomer SiM1

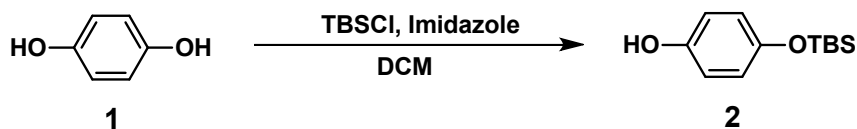

Step 1: A mixture of hydroquinone ( $13.2 \text{ g}$ ,  $120 \text{ mmol}$ ), imidazole ( $5.4 \text{ g}$ ,  $80 \text{ mmol}$ ) and dichloromethane ( $200 \text{ mL}$ ) were added into a  $500 \text{ mL}$  three-neck round-bottom flask. A solution of TBS-Cl ( $6.0 \text{ g}$  in  $30 \text{ mL}$  dichloromethane) was slowly added into the above mixture. After stirring for  $12 \text{ h}$ , the solvent was removed by rotary evaporation and the crude compound was purified by flash chromatography (hexane: EtOAc =  $2: 1$ ) to give the desired intermediate **2** as a colorless oil ( $5.6 \text{ g}$ , yield:  $62\%$ ).  $^1\text{H}$  NMR ( $600 \text{ MHz}$ ,  $\text{CDCl}_3$ )  $\delta$   $6.72$  (s,  $4\text{H}$ ),  $4.52$  (s,  $1\text{H}$ ),  $1.00$  (s,  $9\text{H}$ ),  $0.18$  (s,  $6\text{H}$ ).

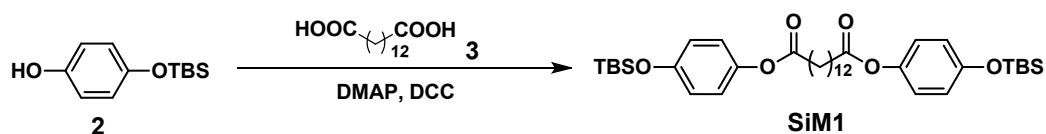

Step 2: A mixture of DMAP ( $0.391 \text{ g}$ ,  $3.2 \text{ mmol}$ ), compound **2** ( $3.589 \text{ g}$ ,  $16 \text{ mmol}$ ), compound **3** ( $2.067 \text{ g}$ ,  $8 \text{ mmol}$ ) and dichloromethane ( $100 \text{ mL}$ ) were added into a  $250 \text{ mL}$  three-neck round-bottom flask and stirred at  $0^\circ\text{C}$ . After slowly adding DCC ( $3.962 \text{ g}$ ,  $19.2 \text{ mmol}$ ), the reaction solution was stirred at  $0^\circ\text{C}$  for  $15 \text{ min}$  and then continuously stirred at room temperature for another  $48 \text{ h}$ . The solvent was removed by rotary evaporation and the crude compound was purified by flash chromatography (hexane: EtOAc= $10:1$ ) to give the desired monomer **SiM1** as a white solid ( $4.342 \text{ g}$ , yield:  $81\%$ ).  $^1\text{H}$  NMR ( $600 \text{ MHz}$ ,  $\text{CDCl}_3$ )  $\delta$   $6.76$  (dd,  $J = 16.8, 8.4 \text{ Hz}$ ,  $4\text{H}$ ),  $6.64$  (dd,  $J = 16.7, 8.4 \text{ Hz}$ ,  $4\text{H}$ ),  $2.35$  (dt,  $J = 16.4, 7.1 \text{ Hz}$ ,  $4\text{H}$ ),  $1.64$ - $1.50$  (m,  $4\text{H}$ ),  $1.25$ - $1.07$  (m,  $16\text{H}$ ),  $0.95$ - $0.75$  (m,  $18\text{H}$ ),  $0.17$ - $0.05$  (m,  $12\text{H}$ ).  $^{13}\text{C}$  NMR ( $151 \text{ MHz}$ ,  $\text{CDCl}_3$ )  $\delta$   $172.6$ ,  $153.1$ ,  $144.7$ ,  $122.2$ ,  $120.4$ ,  $77.2$ ,  $77.0$ ,  $76.8$ ,  $34.3$ ,  $29.5$ ,  $29.2$ ,  $29.1$ ,  $25.6$ ,  $24.9$ ,  $18.1$ ,  $4.4$ .

### Synthesis of monomer SiM2

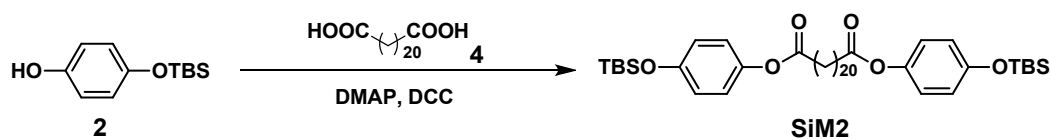

DMAP (0.147 g, 1.2 mmol), compound **2** (1.346 g, 6 mmol), compound **4** (1.112 g, 3 mmol) were dissolved in 100 mL of dichloromethane and stirred at 0 °C. After slowly adding DCC (1.483 g, 7.2 mmol), the above mixture was stirred at 0 °C for 15 min and then continuously stirred at room temperature for another 48 h. After evaporation of the solvent, the residual solid was purified by column chromatography on silica gel using hexane/EtOAc (30/1) as eluent to give desired monomer **SiM2** as a white solid (2.042 g, yield: 87%). <sup>1</sup>H NMR (600 MHz, CDCl<sub>3</sub>) δ 6.74 (d, *J* = 8.6 Hz, 4H), 6.62 (d, *J* = 8.6 Hz, 4H), 2.33 (t, *J* = 7.2 Hz, 4H), 1.58-1.51 (m, 4H), 1.18-1.05 (m, 32H), 0.79 (s, 18H), -0.00 (s, 12H). <sup>13</sup>C NMR (151 MHz, CDCl<sub>3</sub>) δ 172.4, 155.3, 149.6, 138.5, 133.4, 128.0, 127.6, 121.7, 120.3, 77.2, 77.0, 76.8, 34.4, 29.5, 29.1, 25.6, 24.9, 18.2, -4.3.

### Synthesis of monomer SiM3

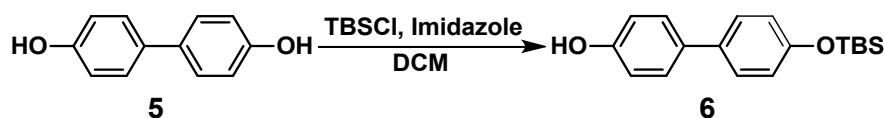

Step 1: A mixture of 4,4'-biphenol (16.8 g, 90 mmol), imidazole (4.0 g, 60 mmol) and dichloromethane (200 mL) were added into a 500 mL three-neck round-bottom flask. A solution of TBDMSCl (4.5 g in 30 mL dichloromethane) was slowly added into the above mixture and continuously stirred for 12 h. The solvent was removed by rotary evaporation and the crude compound was purified by flash chromatography (hexane: EtOAc= 2 :1) to give compound **6** as a white solid (5.1 g, yield: 57%). <sup>1</sup>H NMR (600 MHz, CDCl<sub>3</sub>) δ 7.44 (dd, *J* = 15.2, 8.5 Hz, 4H), 6.91 (t, *J* = 7.6 Hz, 4H), 4.88 (d, *J* = 62.1 Hz, 1H), 1.04 (d, *J* = 2.8 Hz, 9H), 0.26 (d, *J* = 3.4 Hz, 6H).

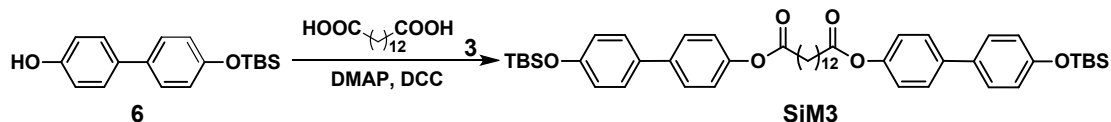

Step 2: DMAP (0.196 g, 1.6 mmol), compound **6** (2.402 g, 8 mmol), compound **3** (1.034 g, 4 mmol) were dissolved in 100 mL of dichloromethane and stirred at 0 °C. After slowly adding DCC (1.980 g, 9.6 mmol), the reaction solution was stirred at 0 °C for 15 min and continuously stirred at room temperature for another 48 h. The

solvent was removed by rotary evaporation and the crude compound was purified by flash chromatography (hexane: EtOAc= 20:1) to give the desired monomer **SiM3** as a white solid (2.568 g, yield: 78%). <sup>1</sup>H NMR (600 MHz, CDCl<sub>3</sub>) δ 7.55 (d, *J* = 8.7 Hz, 4H), 7.45 (d, *J* = 8.6 Hz, 4H), 7.14 (d, *J* = 8.7 Hz, 4H), 6.92 (d, *J* = 8.6 Hz, 4H), 2.59 (t, *J* = 7.5 Hz, 4H), 1.79 (dt, *J* = 15.2, 7.6 Hz, 4H), 1.34 (d, *J* = 18.5 Hz, 16H), 1.02 (s, 18H), 0.25 (s, 12H). <sup>13</sup>C NMR (151 MHz, CDCl<sub>3</sub>) δ 172.4, 155.3, 149.6, 138.5, 133.4, 128.0, 127.6, 121.7, 120.3, 77.2, 77.0, 76.8, 34.4, 29.5, 29.2, 29.1, 25.6, 24.9, 18.2, -4.3.

### Synthesis of monomer **SiM4**

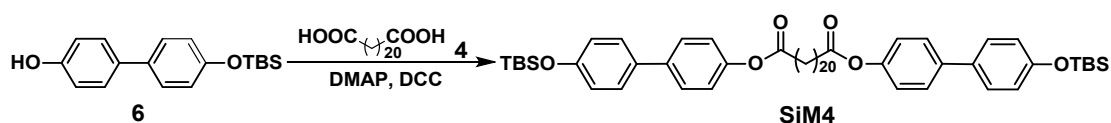

A mixture of DMAP (0.147 g, 1.2 mmol), compound **6** (1.802 g, 6 mmol), compound **4** (1.112 g, 3 mmol) and dichloromethane (100 mL) were added into a 250 mL three-neck round-bottom flask and stirred at 0 °C. After slowly adding DCC (1.483 g, 7.2 mmol) the above mixture was stirred at 0 °C for 15 min and continuously stirred at room temperature for another 48 h. After evaporation of the solvent, the residual solid was purified by column chromatography on silica gel using hexane/EtOAc (50/1) as eluent to give the desired compound **SiM4** as a white solid (2.048 g, yield: 73%). <sup>1</sup>H NMR (600 MHz, CDCl<sub>3</sub>) δ 6.74 (d, *J* = 8.9 Hz, 4H), 6.62 (d, *J* = 8.9 Hz, 4H), 2.33 (t, *J* = 7.5 Hz, 4H), 1.58 – 1.51 (m, 4H), 1.18 – 1.05 (m, 32H), 0.79 (s, 18H), -0.00 (s, 12H). <sup>13</sup>C NMR (151 MHz, CDCl<sub>3</sub>) δ 172.4, 155.3, 149.6, 138.5, 133.4, 128., 127.6, 121.7, 120.3, 77.2, 77.0, 76.8, 34.4, 29.5, 29.2, 29.1, 25.6, 24.9, 18.2, -4.3.

### Synthesis of monomer **FM1**

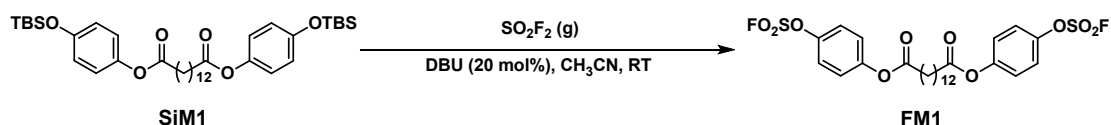

A mixture of **SiM1** (670 mg, 1 mmol) and dry acetonitrile (10 mL) were added into a 25 mL Schlenk-type flask and stirred. The flask was degassed and exchanged with SO<sub>2</sub>F<sub>2</sub>. DBU (30.4 mg, 0.2 mmol) was injected into the flask by syringe. After stirring at room temperature for 12 h, the reaction mixture was quenched with 1 M

HCl (10 mL) and extracted twice with EtOAc (10 mL  $\times$  2). The organic extracts were washed with brine (20 mL), dried over anhydrous Na<sub>2</sub>SO<sub>4</sub>, filtered and concentrated. The product **FM1** was obtained as a white solid (565 mg, 93% yield). <sup>1</sup>H NMR (600 MHz, CDCl<sub>3</sub>)  $\delta$  7.35 (t,  $J$  = 6.2 Hz, 4H), 7.22 – 7.18 (m, 4H), 2.57 (t,  $J$  = 7.5 Hz, 4H), 1.78 – 1.71 (m, 4H), 1.43 – 1.37 (m, 4H), 1.37 – 1.28 (m, 12H). <sup>13</sup>C NMR (151 MHz, CDCl<sub>3</sub>)  $\delta$  171.81 (s), 150.36 (s), 147.01 (s), 123.57 (s), 122.03 (s), 77.25 (s), 77.04 (s), 76.83 (s), 34.28 (s), 29.49 (d,  $J$  = 17.7 Hz), 29.24 (s), 29.07 (s), 24.81 (s). <sup>19</sup>F NMR (282 MHz, CDCl<sub>3</sub>)  $\delta$  38.44 (s).

### Synthesis of P1

**SiM1** (67.0 mg, 1 mmol) and **FM1** (60.6 mg, 1 mmol) were added in a 10 mL Schlenk flask. The flask was degassed and exchanged with N<sub>2</sub> *via* three cycles. A 0.1 mL of DBU solution (30.4 mg in 1 mL TCB) was added into above mixture and continuously stirred at 80 °C for 12 h. The reaction mixtures were then heated to dissolve any precipitated polymer (in some cases additional TCB was necessary to achieve complete dissolution) and the resulting homogenous solution was directly poured into ~100 mL of methanol to precipitate polymers. The collected solid was further dissolved in TCB and re-precipitated from methanol. After three cycles, the product was dried in high vacuum for 24 h to give the desired polymer **P1** as a white solid (57.3 mg, yield: 57%). <sup>1</sup>H NMR (300 MHz, 1,2-dichlorobenzene-d<sub>4</sub>)  $\delta$  7.16 (d,  $J$  = 6.7 Hz, 4H), 7.09 (s, 4H), 2.54 (t,  $J$  = 7.0 Hz, 4H), 1.74 (s, 4H), 1.30 (d,  $J$  = 13.0 Hz, 16H).

### Synthesis of P2

**SiM2** (78.2 mg, 0.1 mmol) and **FM1** (60.6 mg, 0.1 mmol) were added in a 10 mL Schlenk flask. The flask was degassed and exchanged with N<sub>2</sub>. A 0.1 mL solution of DBU (30.4 mg/mL) in TCB was added into above mixture and continuously stirred at 80 °C for 12 h. The reaction mixtures were then heated to dissolve any precipitated polymer (in some cases additional TCB was necessary to achieve complete dissolution) and the resulting homogenous solution was directly poured into ~100 mL of methanol to precipitate polymers. The collected solid was further dissolved in TCB and re-precipitated from methanol. After three cycles, the product was dried in high vacuum for 24 h to give the desired polymer **P2** as a white solid (68.5 mg, yield:

61%).  $^1\text{H}$  NMR (300 MHz, 1,2-dichlorobenzene- $d_4$ )  $\delta$  7.21 – 7.11 (m, 4H), 7.09 (s, 4H), 3.01-2.66 (m, 4H), 2.05 (s, 4H), 1.60 (d,  $J$  = 30.7 Hz, 16H).

### Synthesis of P3

**SiM3** (82.3 mg, 1 mmol) and **FM1** (60.6 mg, 1 mmol) were added in a 10 mL Schlenk flask. The flask was degassed and exchanged with  $\text{N}_2$  *via* three freeze-thaw cycles. A 0.1 mL solution of DBU (30.4 mg/mL) in TCB was added into above mixture and continuously stirred at 80 °C for 12 h. The reaction mixtures were then heated to dissolve any precipitated polymer (in some cases additional TCB was necessary to achieve complete dissolution) and the resulting homogenous solution was directly poured into ~100 mL of methanol to precipitate polymers. The collected solid was further dissolved in TCB and re-precipitated from methanol. After three cycles, the product was dried in high vacuum for 24 h to give the desired polymer **P3** as a white solid (55.8 mg, yield: 48%).  $^1\text{H}$  NMR (300 MHz, 1,2-dichlorobenzene- $d_4$ )  $\delta$  7.72 (d,  $J$  = 7.7 Hz, 4H), 7.43 (s, 4H), 7.35 (s, 4H), 2.54 (t,  $J$  = 7.3 Hz, 4H), 1.83-1.69 (m, 4H), 1.36 (d,  $J$  = 36.4 Hz, 32H).

### Synthesis of P4

**SiM4** (93.5 mg, 1 mmol) and **FM1** (60.6 mg, 1 mmol) were added in a 10 mL in a Schlenk-type flask. The flask was degassed and exchanged with  $\text{N}_2$  *via* three freeze-thaw cycles. A 0.1 mL solution of DBU (30.4 mg/mL) in TCB was added into above mixture and continuously stirred at 80 °C for 12 h. The reaction mixtures were then heated to dissolve any precipitated polymer (in some cases additional TCB was necessary to achieve complete dissolution) and the resulting homogenous solution was directly poured into ~100 mL of methanol to precipitate polymers. The collected solid was further dissolved in TCB and re-precipitated from methanol. After three cycles, the product was dried in high vacuum for 24 h to give the desired polymer **P4** as a white solid (57.1 mg, yield: 45%).  $^1\text{H}$  NMR (300 MHz, 1,2-dichlorobenzene- $d_4$ )  $\delta$  7.70 (d,  $J$  = 8.2 Hz, 4H), 7.41 (s, 4H), 7.35 (s, 4H), 2.73 – 2.41 (m, 4H), 1.78 (s, 4H), 1.19 (m, 32H).

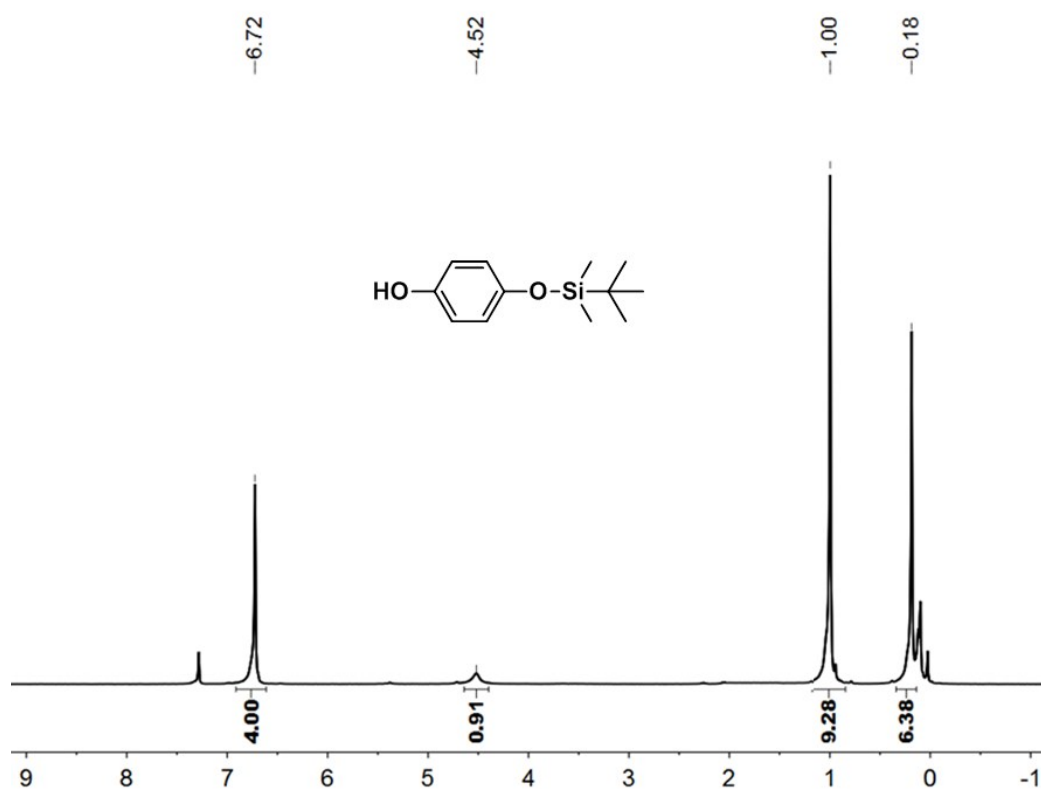

Figure S1. <sup>1</sup>H NMR spectrum of Compound 2.

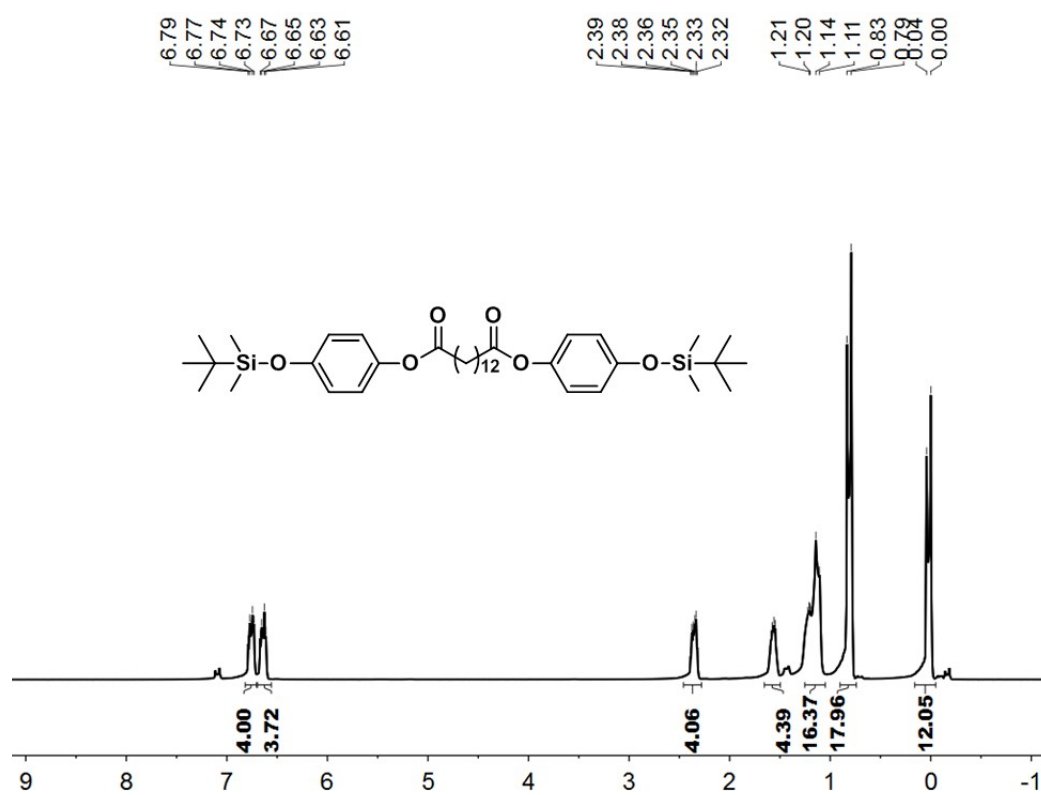

Figure S2. <sup>1</sup>H NMR spectrum of SiM1.

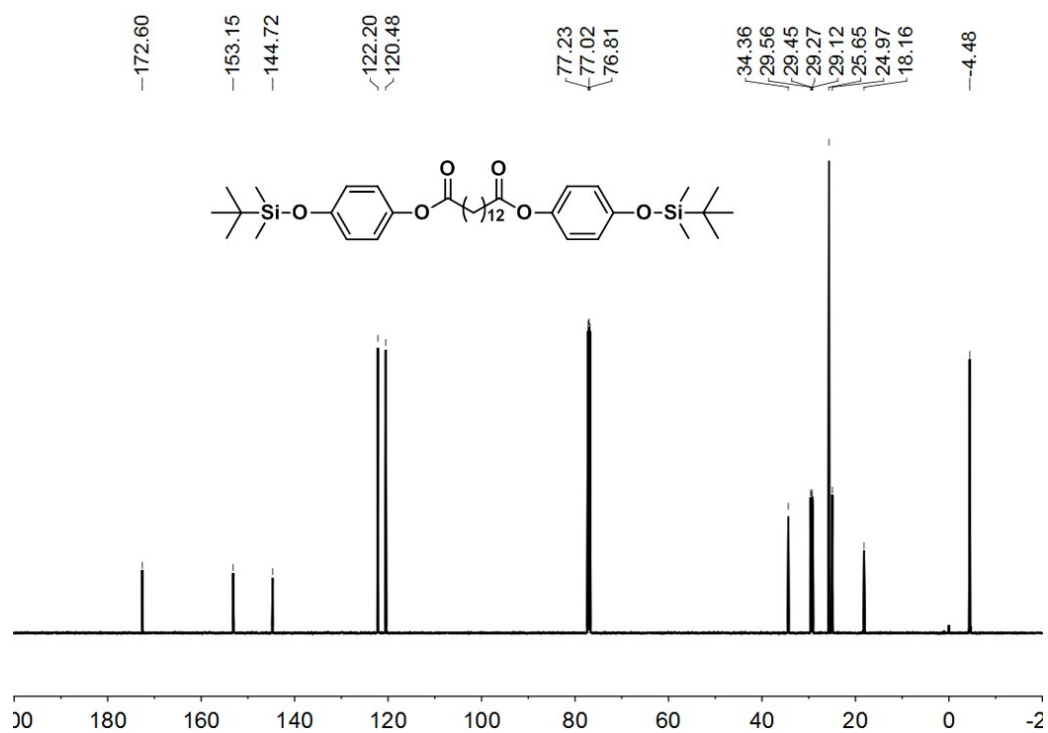

Figure S3. <sup>13</sup>C NMR spectrum of SiM1.

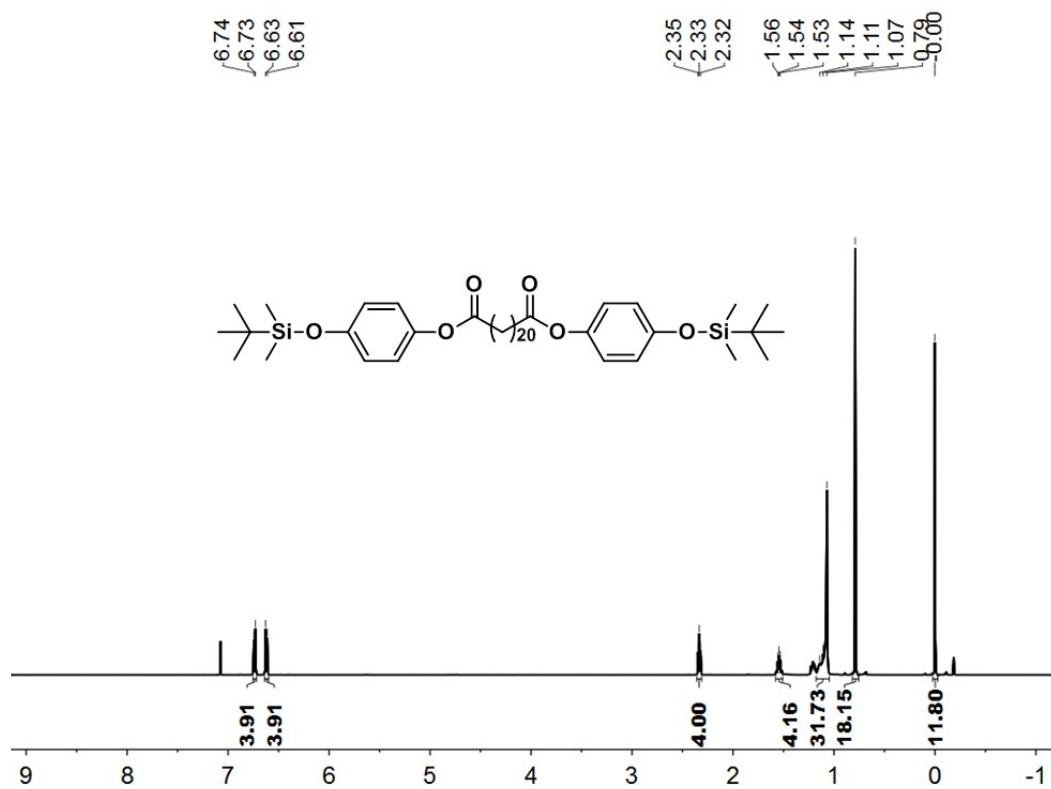

Figure S4. <sup>1</sup>H NMR spectrum of SiM2.

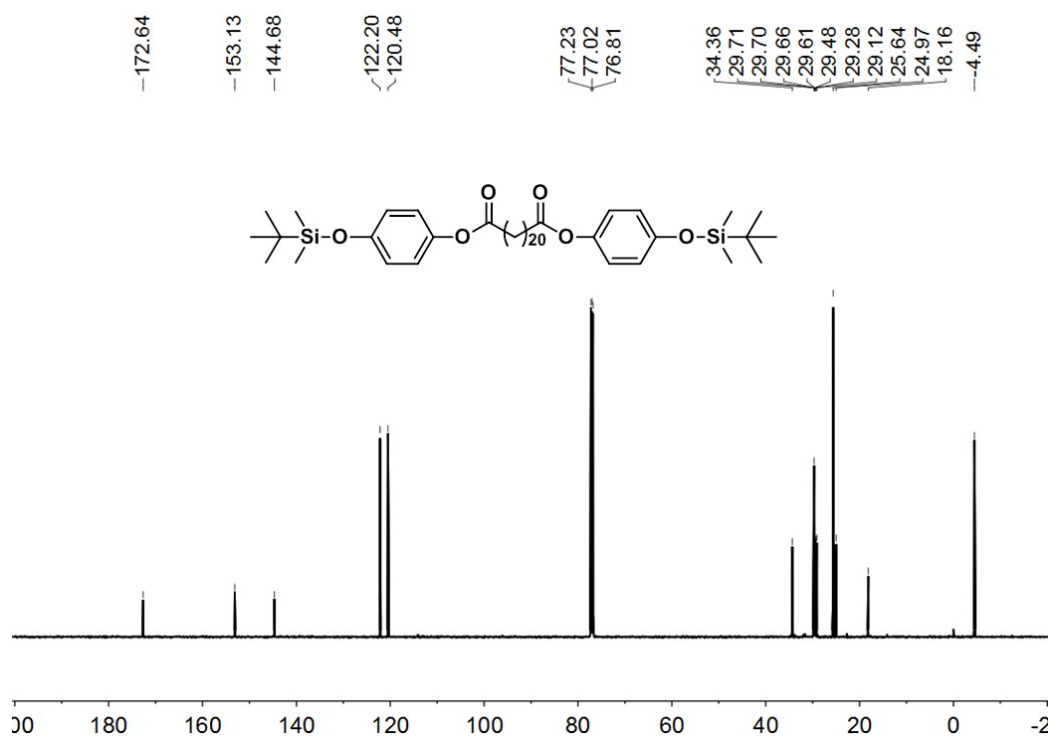

Figure S5. <sup>13</sup>C NMR spectrum of SiM2.

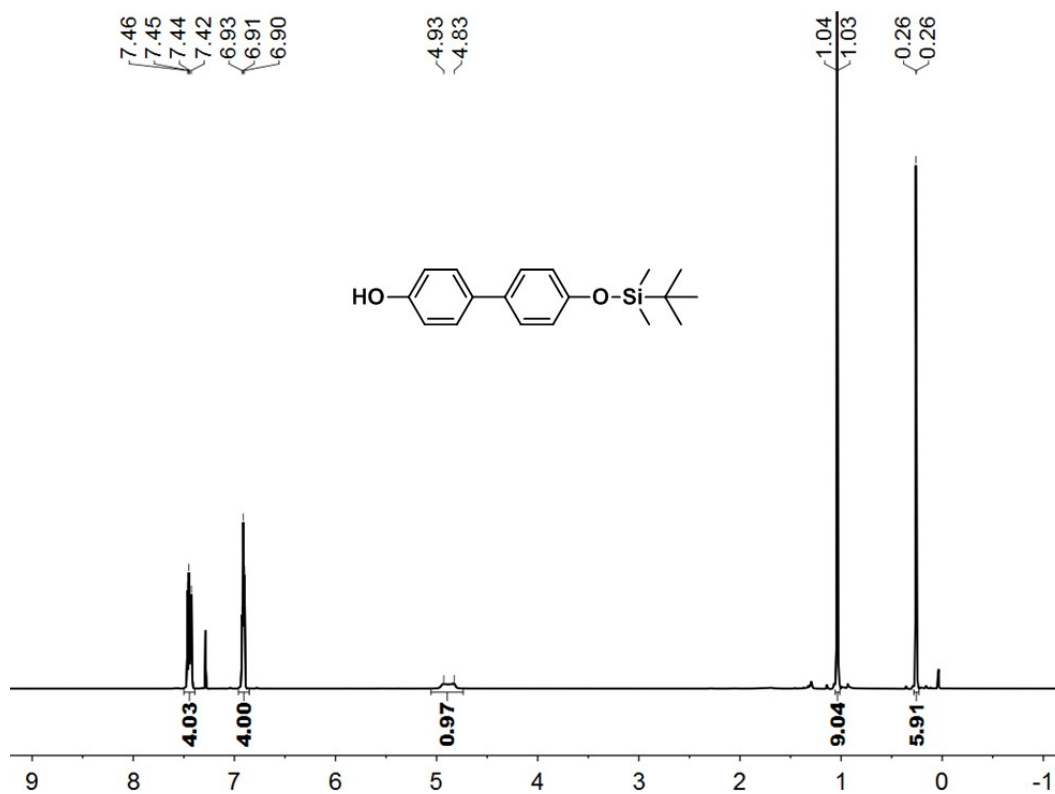

Figure S6. <sup>1</sup>H NMR spectrum of Compound 6.

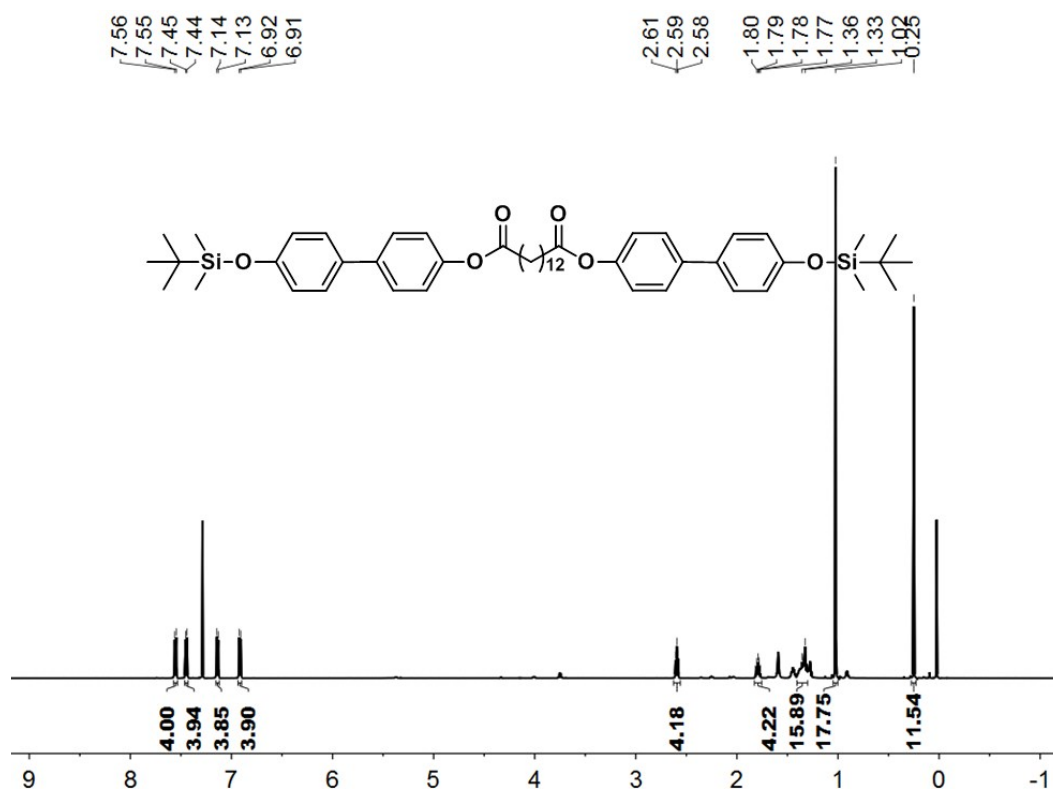

**Figure S7.** <sup>1</sup>H NMR spectrum of SiM3.

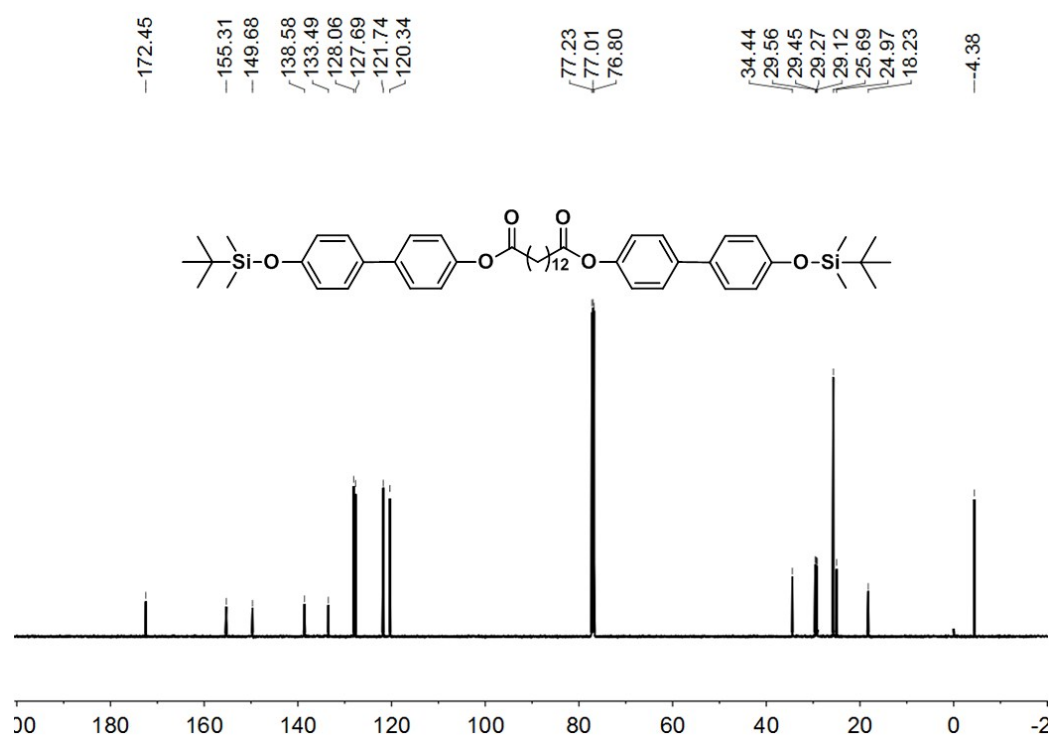

**Figure S8.** <sup>13</sup>C NMR spectrum of SiM3.

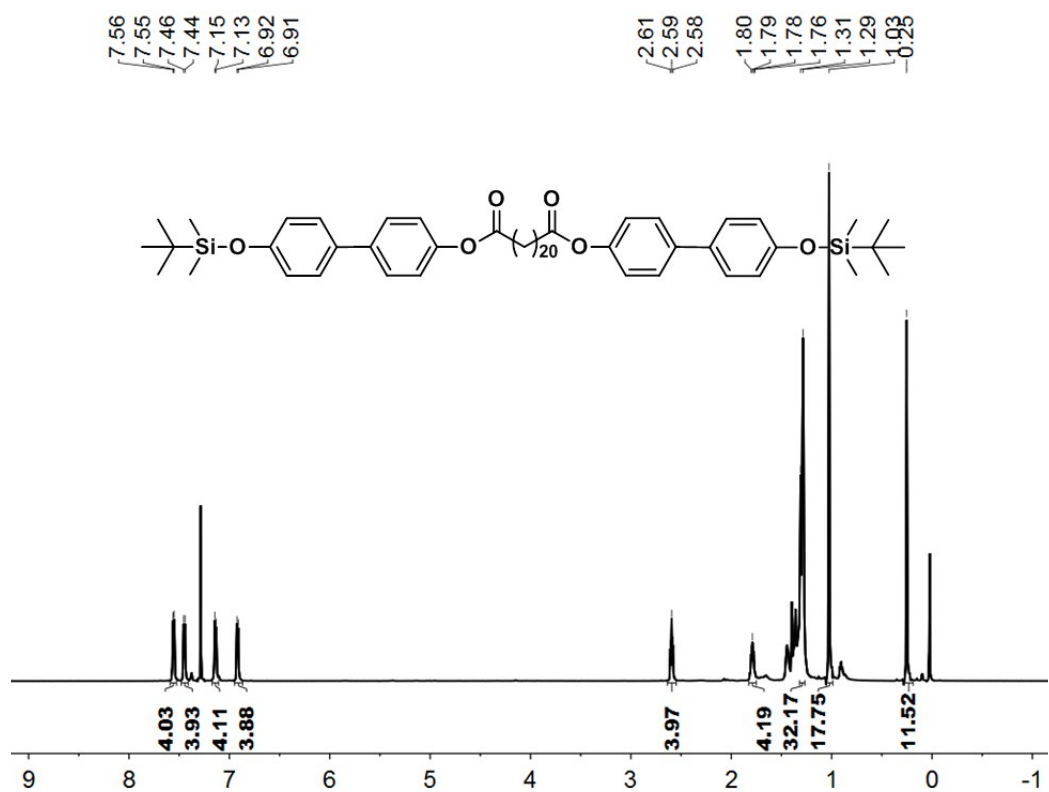

Figure S9. <sup>1</sup>H NMR spectrum of SiM4.

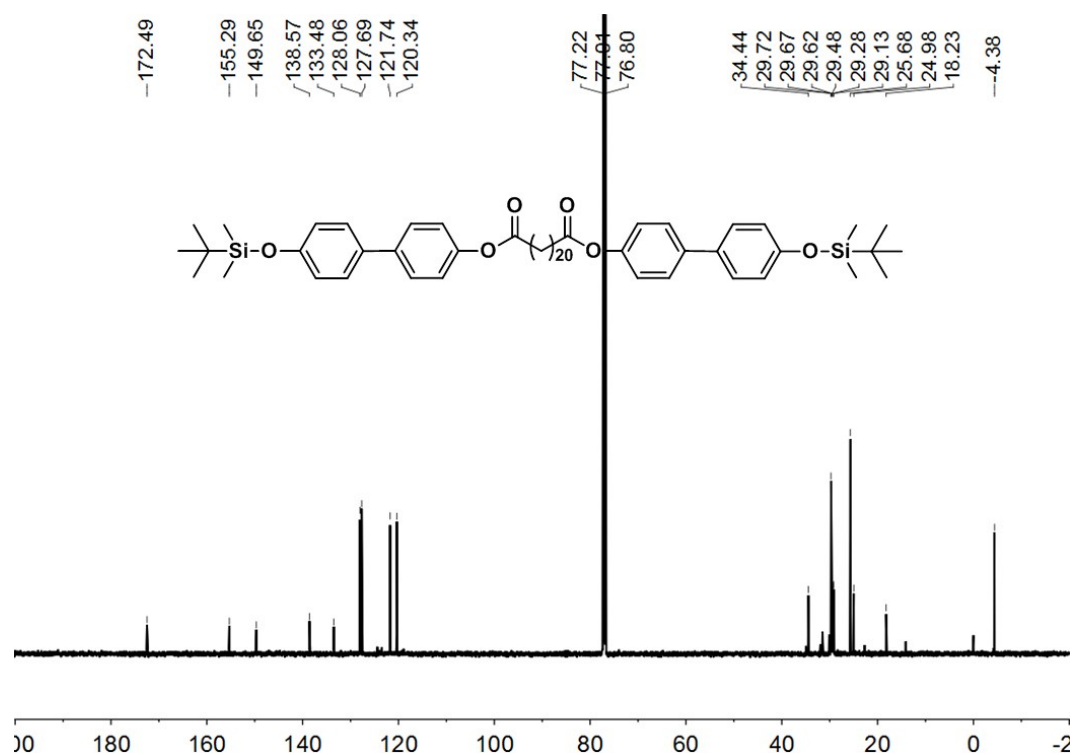

Figure S10. <sup>13</sup>C NMR spectrum of SiM4.

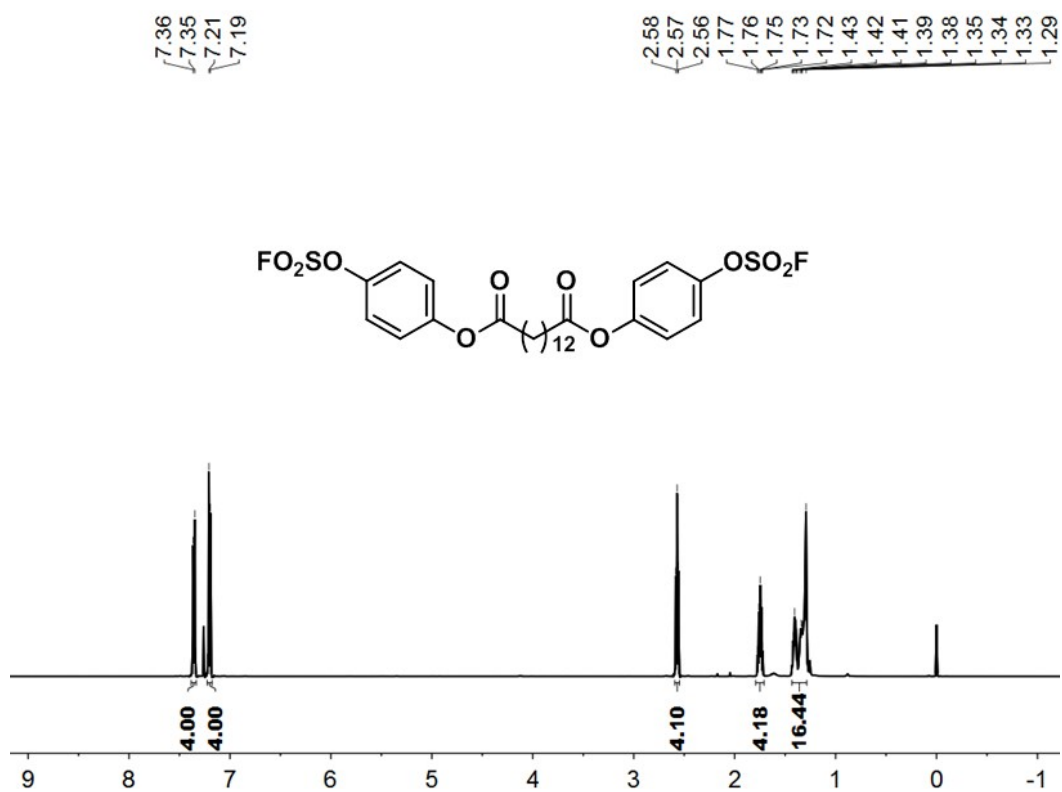

Figure S11. <sup>1</sup>H NMR spectrum of FM1.

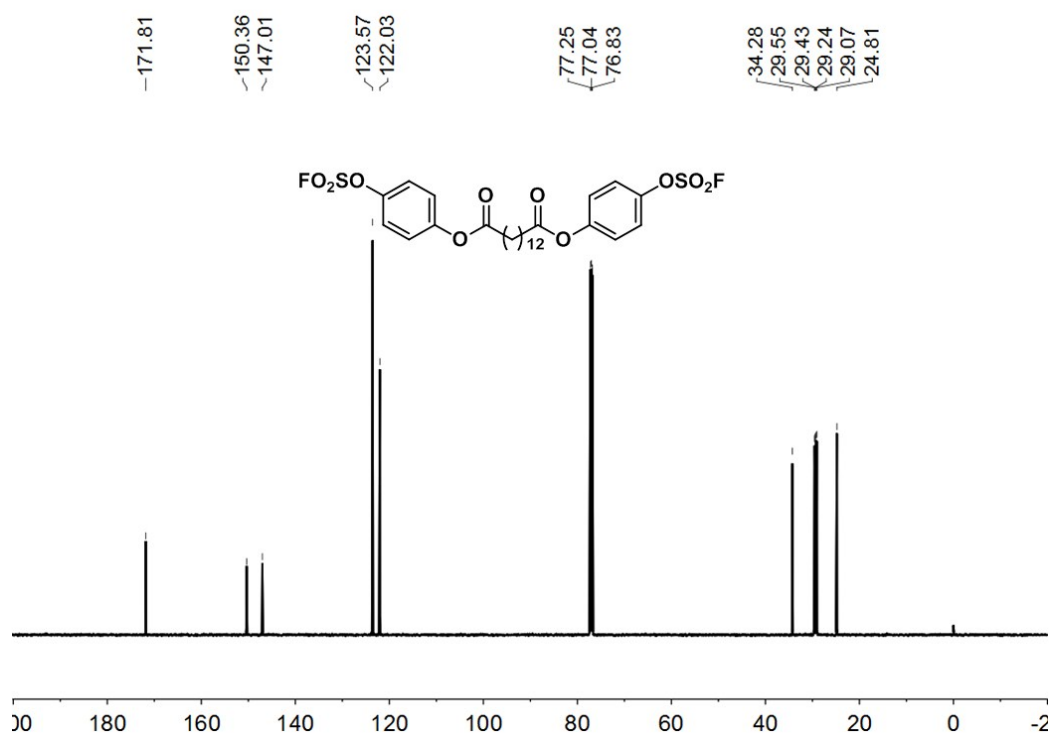

Figure S12. <sup>13</sup>C NMR spectrum of FM1.

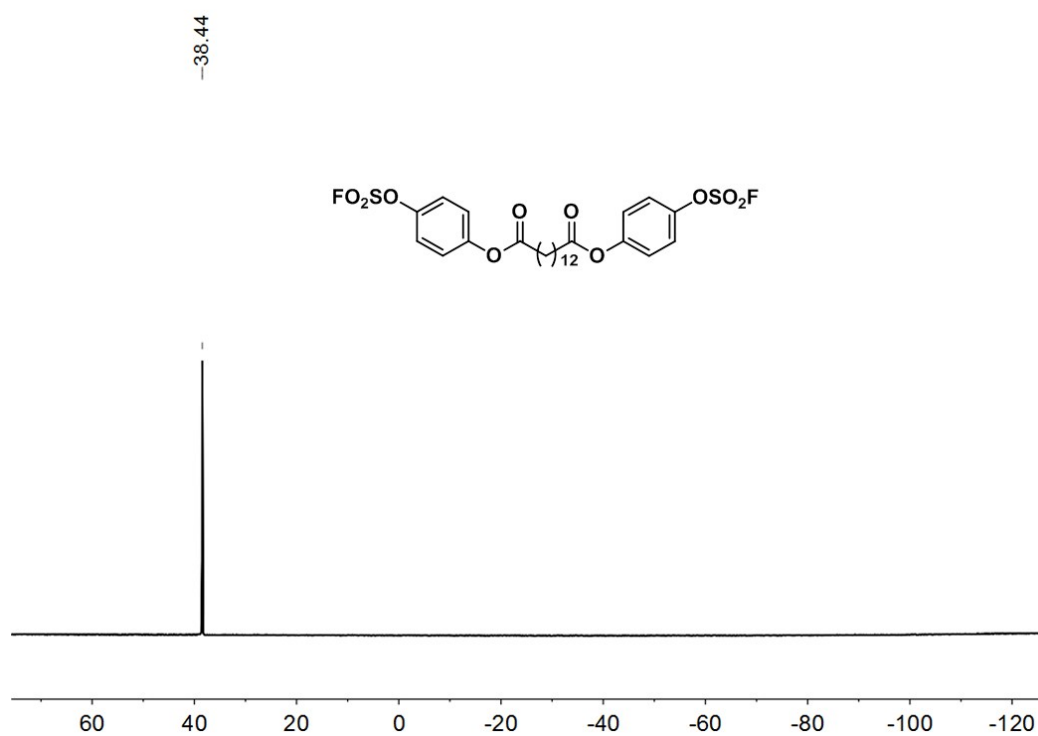

**Figure S13.**  $^{19}\text{F}$  NMR spectrum of FM1.

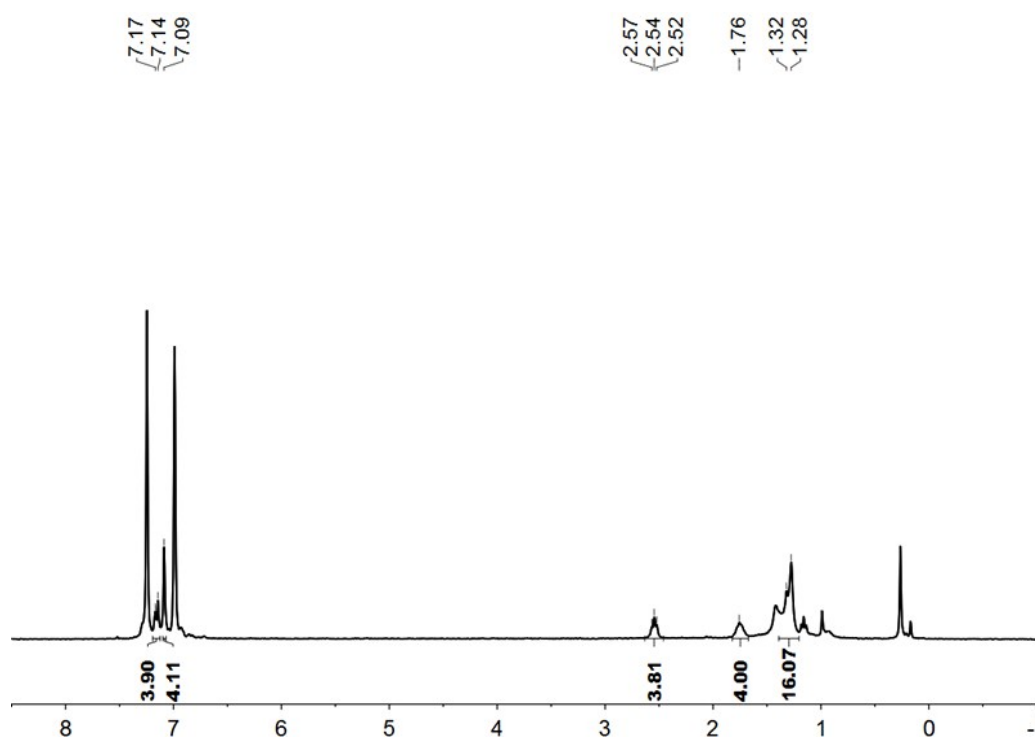

**Figure S14.**  $^1\text{H}$  NMR spectrum of P1.

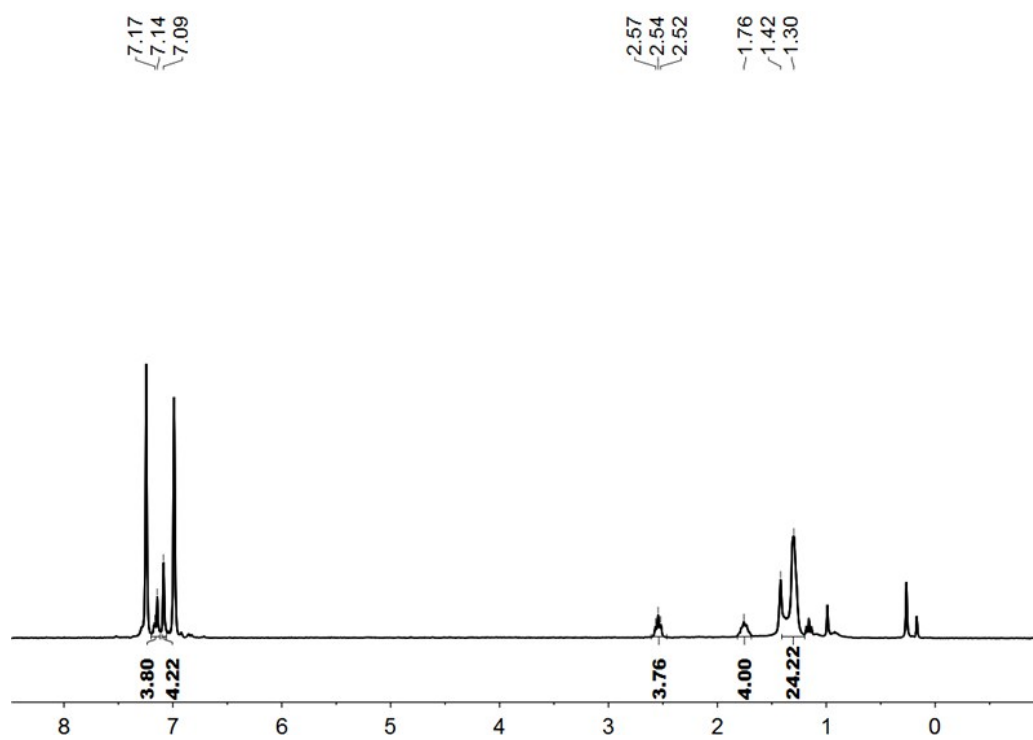

**Figure S15.** <sup>1</sup>H NMR spectrum of P2.

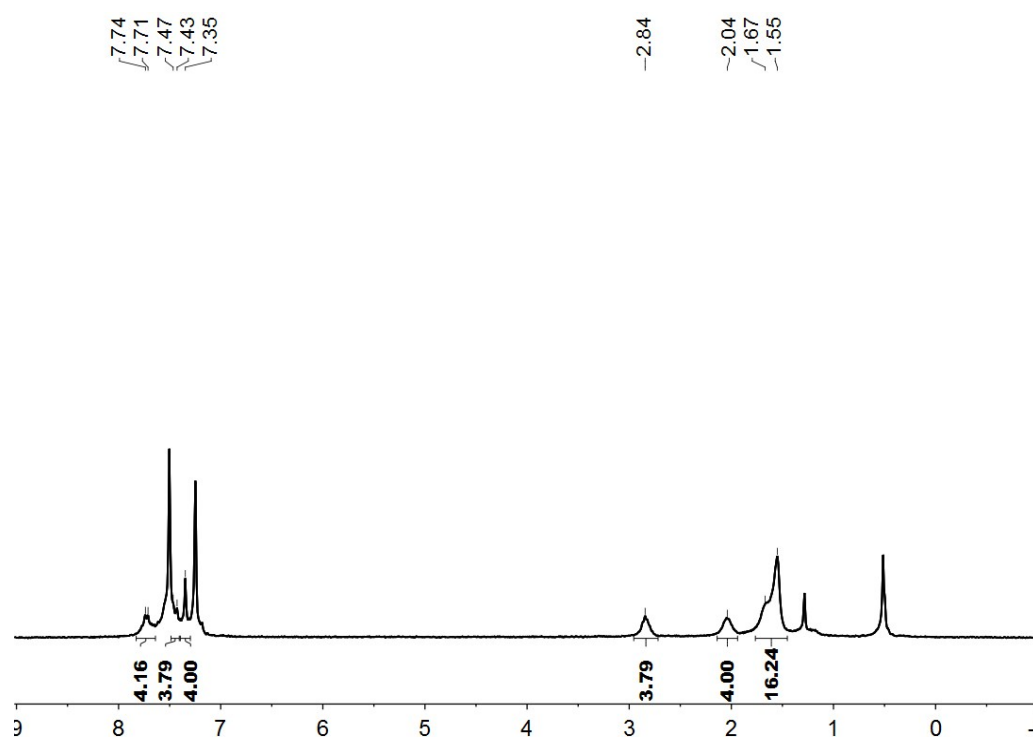

**Figure S16.** <sup>1</sup>H NMR spectrum of P3.

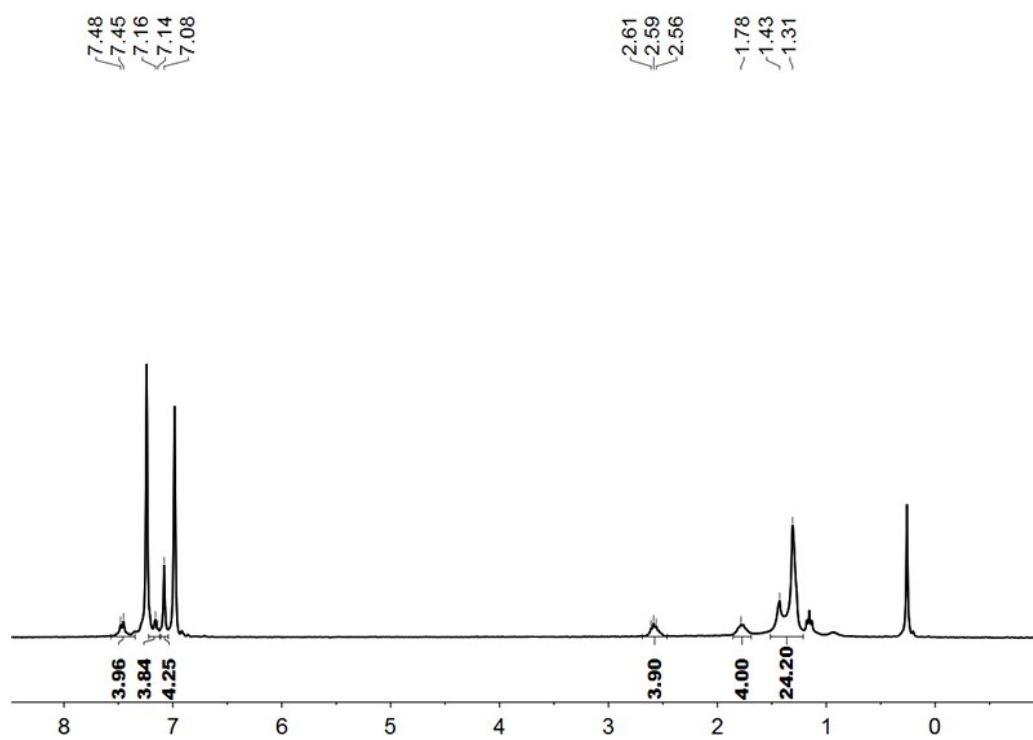

Figure S17.  $^1\text{H}$  NMR spectrum of P4.

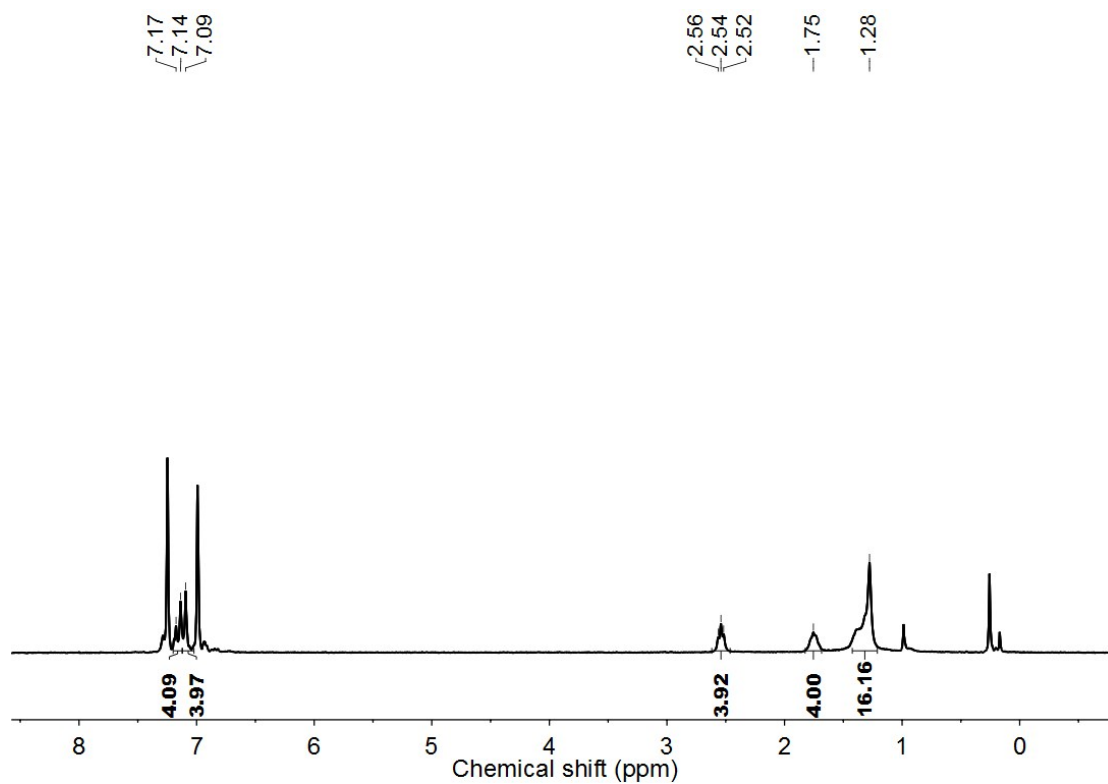

Figure S18.  $^1\text{H}$  NMR spectrum of the precipitate.

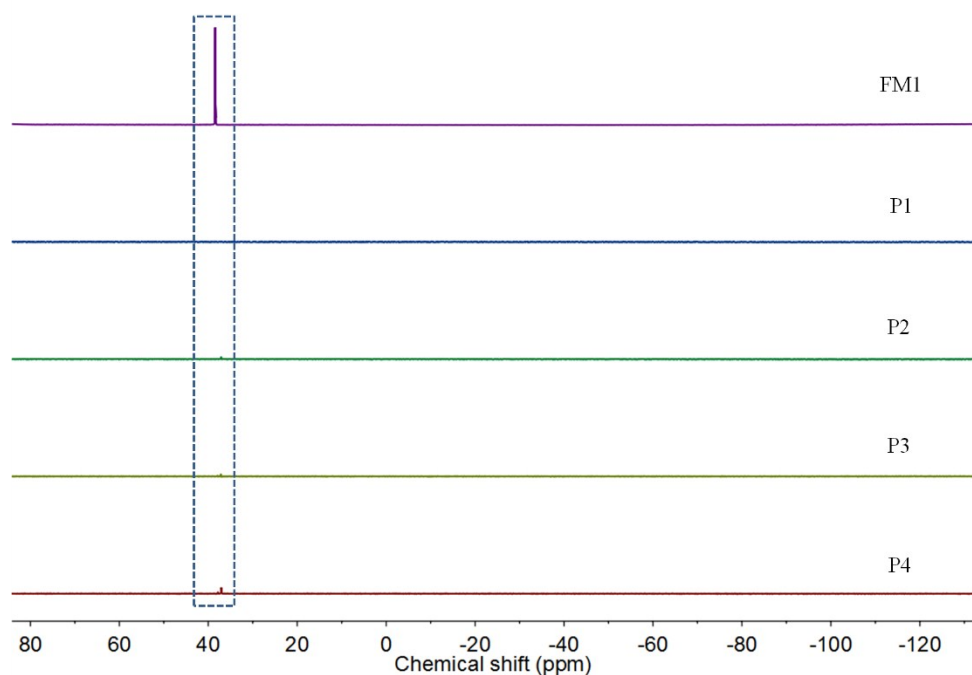

Figure S19.  $^{19}\text{F}$  NMR spectra of **FM1**, **P1**, **P2**, **P3** and **P4**.

**Table S1.** Mesomorphic Properties of the Monomers and Polymers<sup>a</sup>

| Monomers    | Phase transitions (°C)      | Polymers  | Phase transitions (°C)               |
|-------------|-----------------------------|-----------|--------------------------------------|
| <b>SiM1</b> | K 47 I<br>I 18 K            | <b>P1</b> | G 135 X 141 N 169 I<br>I 122 N 106 G |
| <b>SiM2</b> | K 69 I<br>I 46 K            | <b>P2</b> | G 123 N 160 I<br>I 108 G             |
| <b>SiM3</b> | K 120 I<br>I 105 K          | <b>P3</b> | G 131 N 182 I<br>I 171 N 120 G       |
| <b>SiM4</b> | K 69 N 103 I<br>I 74 N 64 K | <b>P4</b> | G 99 N 162 I<br>I 159 N 87 G         |
| <b>FM1</b>  | K 78 I<br>I 59 K            |           |                                      |

<sup>a</sup>Determined by the combination of POM and DSC. K = crystalline, G = glass phase, N = nematic phase, I = isotropic phase, X = unidentified phase. First line obtained on heating, second line obtained on cooling.

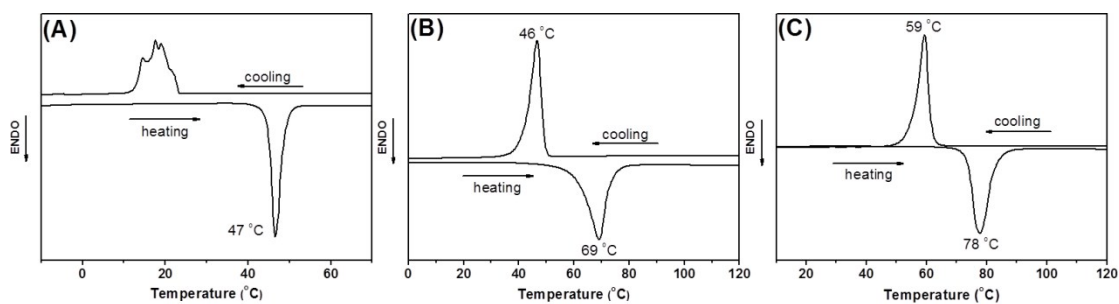

**Figure S20.** DSC curves of (A) SiM1, (B) SiM2, and (C) FM1.

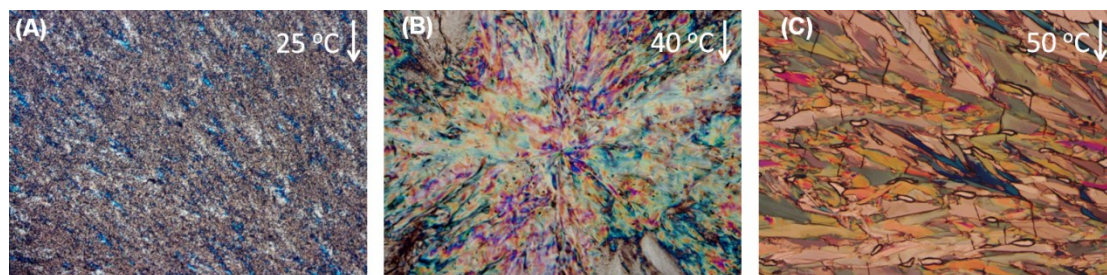

**Figure S21.** POM images of (A) SiM1, (B) SiM2, (C) FM1.

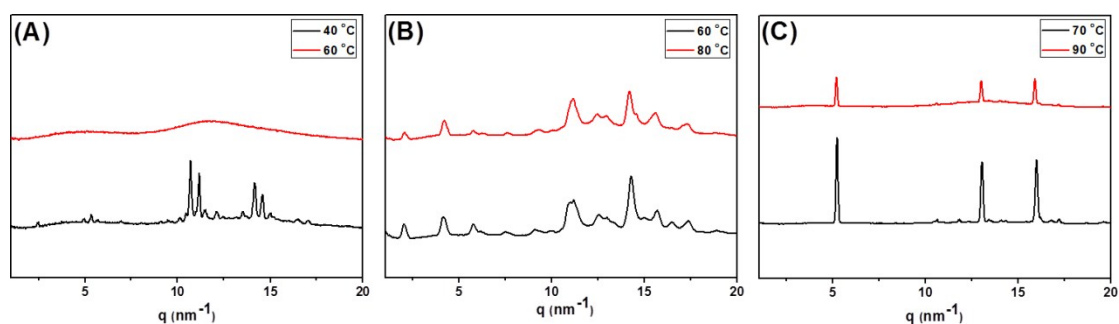

**Figure S22.** 1D-WAXS patterns of (A) SiM1, (B) SiM2, (C) FM1.

**Table S2.** SuFEx reaction conditions and the corresponding polymerization results.

| Entry | Polymer   | Solvent | Catalysts | Temp./°C | Mn (g/mol) | Mw(g/mol) | PDI  |
|-------|-----------|---------|-----------|----------|------------|-----------|------|
| 1     | <b>P1</b> | NMP     | DBU       | r.t.     | 3140       | 5600      | 1.79 |
| 2     | <b>P1</b> | DMF     | DBU       | r.t.     | 3180       | 4260      | 1.34 |
| 3     | <b>P1</b> | TCB     | DBU       | r.t.     | 5360       | 8540      | 1.59 |
| 4     | <b>P1</b> | TCB     | DBU       | 80       | 6910       | 15280     | 2.21 |
| 5     | <b>P1</b> | TCB     | DBU       | 120      | 3850       | 6000      | 1.56 |
| 6     | <b>P1</b> | TCB     | TBD       | 80       | 2540       | 4660      | 1.84 |
| 7     | <b>P1</b> | TCB     | BEMP      | 80       | 1930       | 2990      | 1.55 |

Entry1 of Table S2

MW Averages

Mp: 3890                      Mn: 3136                      Mv: 5128                      Mw: 5599  
Mz: 9617                      Mz+1: 14318                      PD: 1.7854

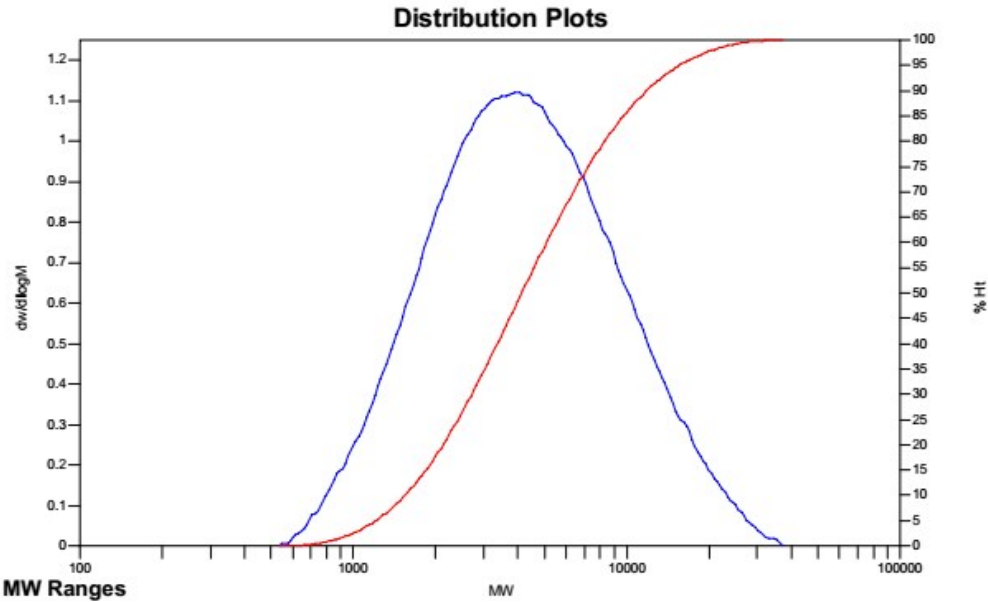

Entry 2 of Table S2

MW Averages

Mp: 3641                      Mn: 3182                      Mv: 4076                      Mw: 4258  
Mz: 5661                      Mz+1: 7324                      PD: 1.3382

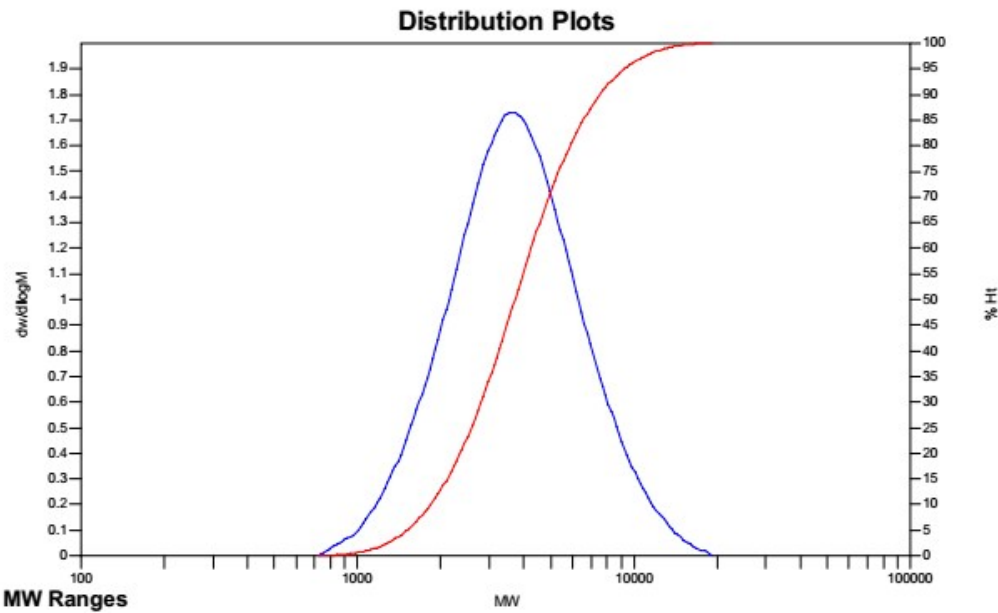

Entry 3 of Table S2

MW Averages

Mp: 5752                      Mn: 5358                      Mv: 7919                      Mw: 8535  
Mz: 13690                      Mz+1: 19519                      PD: 1.5929

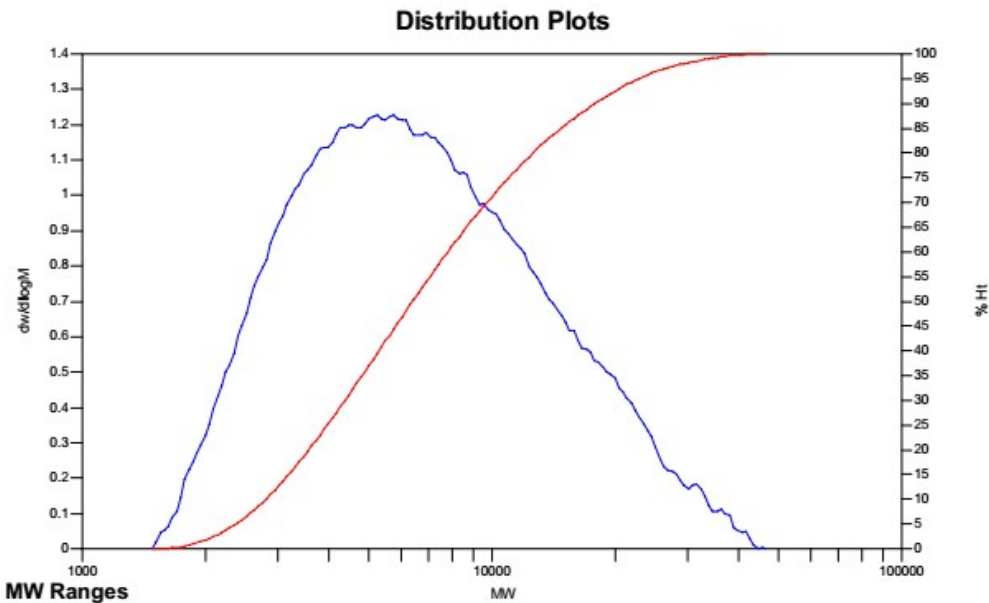

Entry 4 of Table S2

MW Averages

Mp: 9988                      Mn: 6908                      Mv: 13765                      Mw: 15275  
Mz: 27372                      Mz+1: 39456                      PD: 2.2112

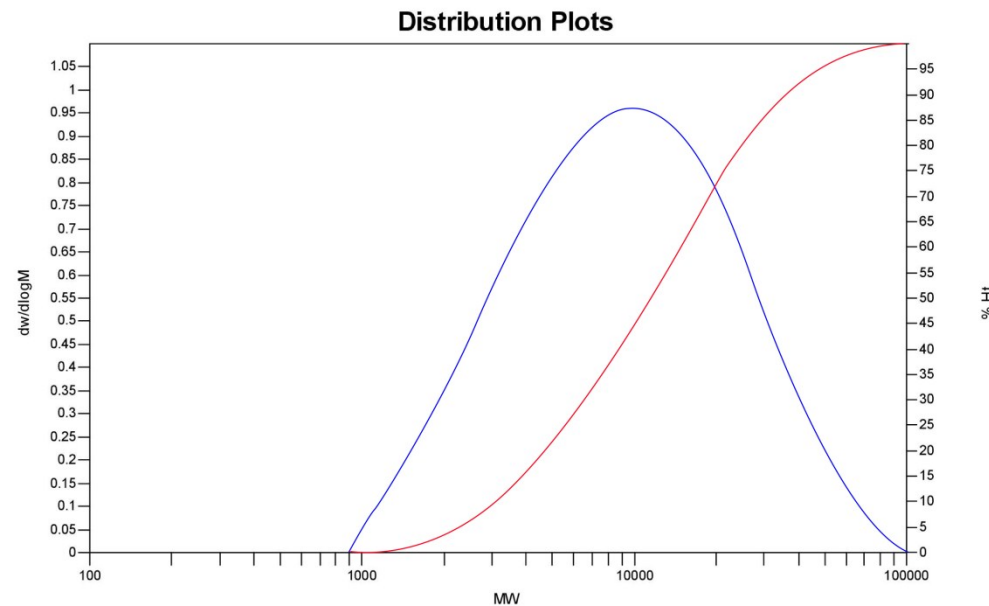

Entry 5 of Table S2

|             |             |            |          |
|-------------|-------------|------------|----------|
| MW Averages |             |            |          |
| Mp: 3801    | Mn: 3847    | Mv: 5588   | Mw: 5999 |
| Mz: 9343    | Mz+1: 12985 | PD: 1.5594 |          |

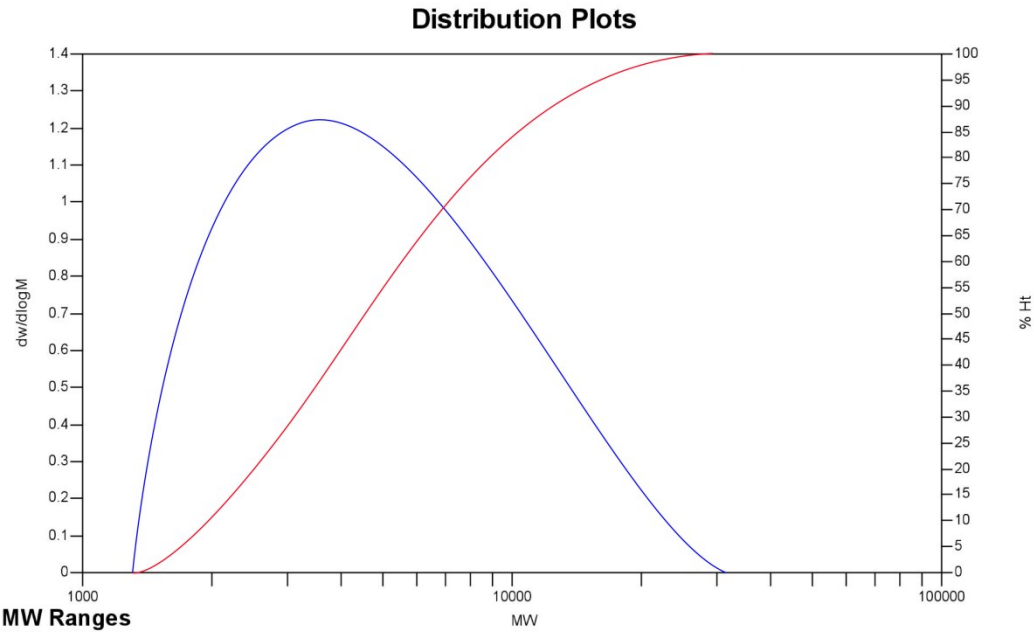

Entry 6 of Table S2

|             |             |            |          |
|-------------|-------------|------------|----------|
| MW Averages |             |            |          |
| Mp: 3630    | Mn: 2535    | Mv: 4277   | Mw: 4663 |
| Mz: 7676    | Mz+1: 10601 | PD: 1.8394 |          |

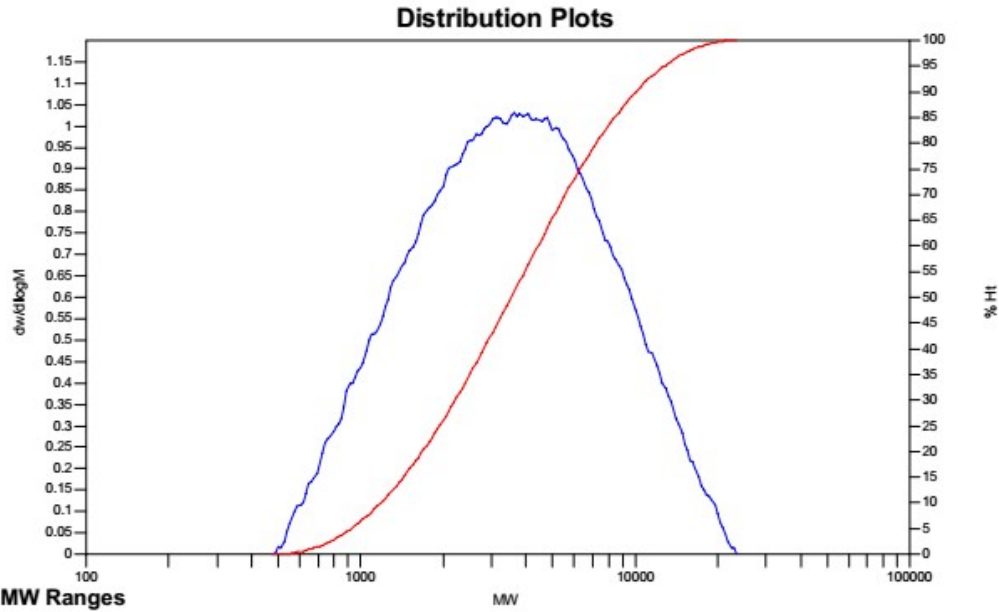

Entry 7 of Table S2

MW Averages

|          |            |            |          |
|----------|------------|------------|----------|
| Mp: 2291 | Mn: 1933   | Mv: 2801   | Mw: 2989 |
| Mz: 4491 | Mz+1: 6180 | PD: 1.5463 |          |

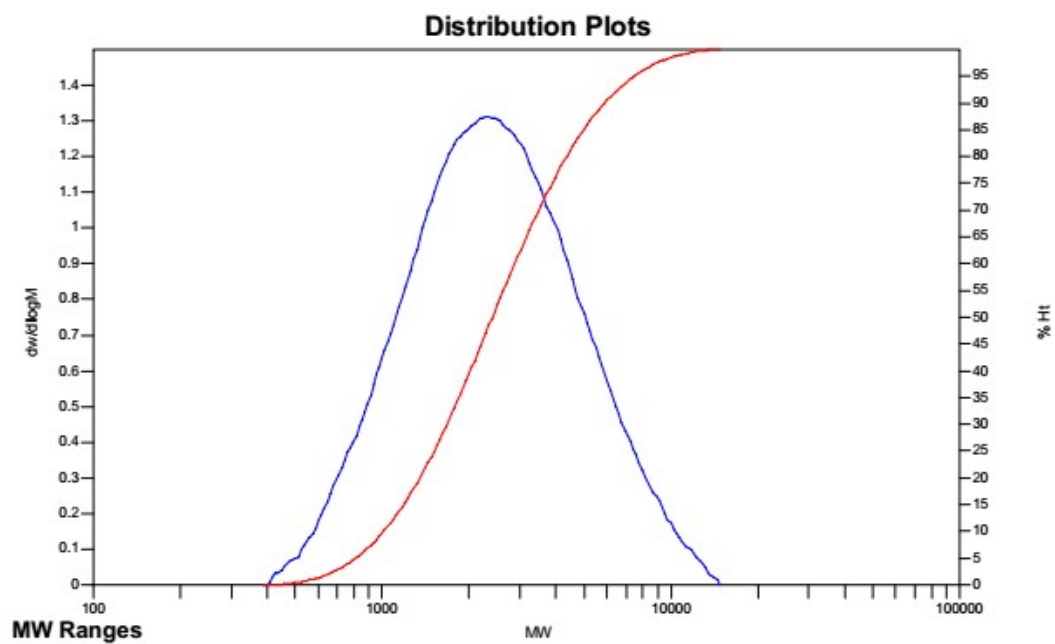

**Table S3.** Polymerization of fluoro-terminal monomer **FM1** and silyl-terminal monomer **SiM1-4** performed at 80 °C in TCB for 12 h by using DBU (20 mol%) as catalyst.

| Entry | Monomer    | Monomer     | Polymer   | Mn(g/mol) | Mw(g/mol) | PDI  | Yield (%) |
|-------|------------|-------------|-----------|-----------|-----------|------|-----------|
| 1     | <b>FM1</b> | <b>SiM1</b> | <b>P1</b> | 6910      | 15280     | 2.21 | 57        |
| 2     | <b>FM1</b> | <b>SiM2</b> | <b>P3</b> | 10020     | 13800     | 1.46 | 61        |
| 3     | <b>FM1</b> | <b>SiM3</b> | <b>P2</b> | 6610      | 12900     | 1.95 | 48        |
| 4     | <b>FM1</b> | <b>SiM4</b> | <b>P4</b> | 6680      | 13130     | 1.97 | 45        |

#### Entry 1 of Table S3

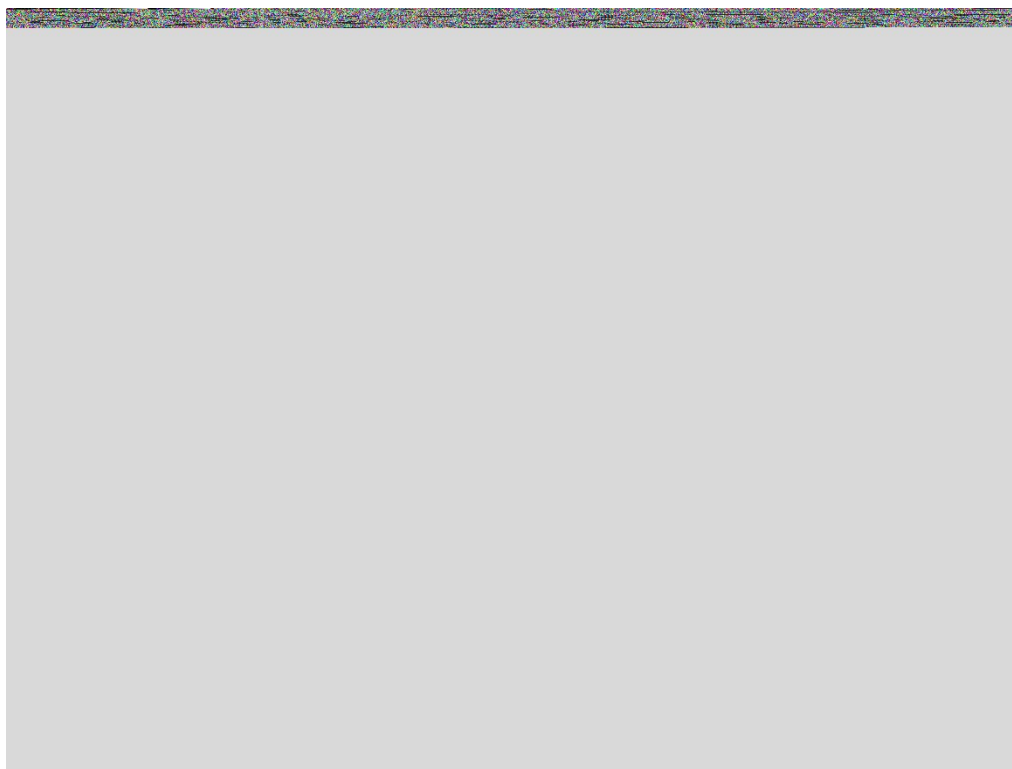

Entry 2 of Table S3

|             |             |            |           |
|-------------|-------------|------------|-----------|
| MW Averages |             |            |           |
| Mp: 12873   | Mn: 10018   | Mv: 13802  | Mw: 14590 |
| Mz: 20572   | Mz+1: 26876 | PD: 1.4564 |           |

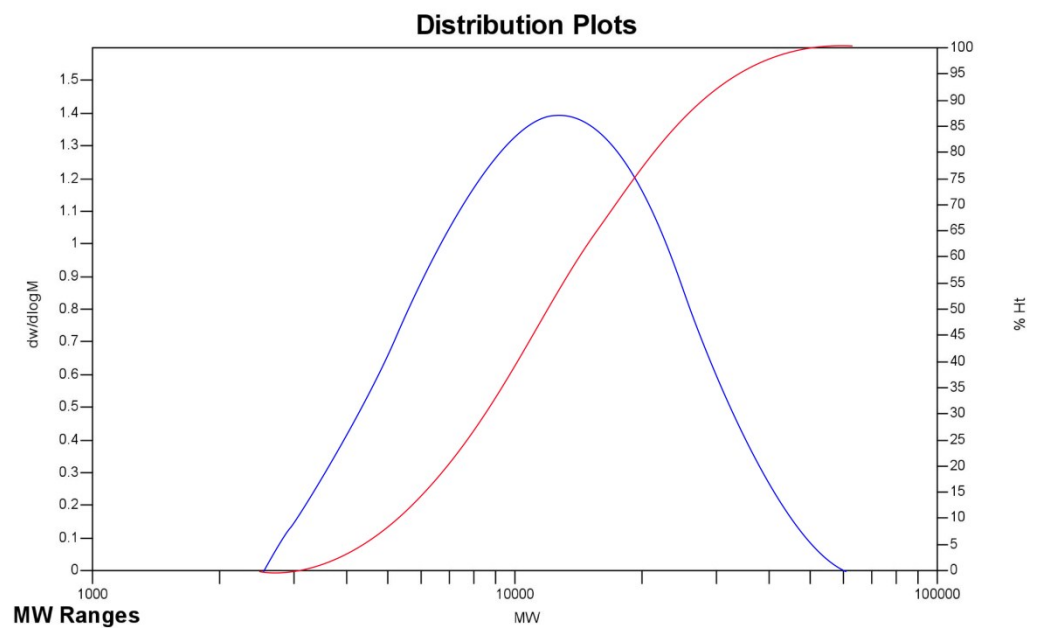

Entry 3 of Table S3

|             |             |            |           |
|-------------|-------------|------------|-----------|
| MW Averages |             |            |           |
| Mp: 10325   | Mn: 6610    | Mv: 11726  | Mw: 12877 |
| Mz: 22295   | Mz+1: 32416 | PD: 1.9481 |           |

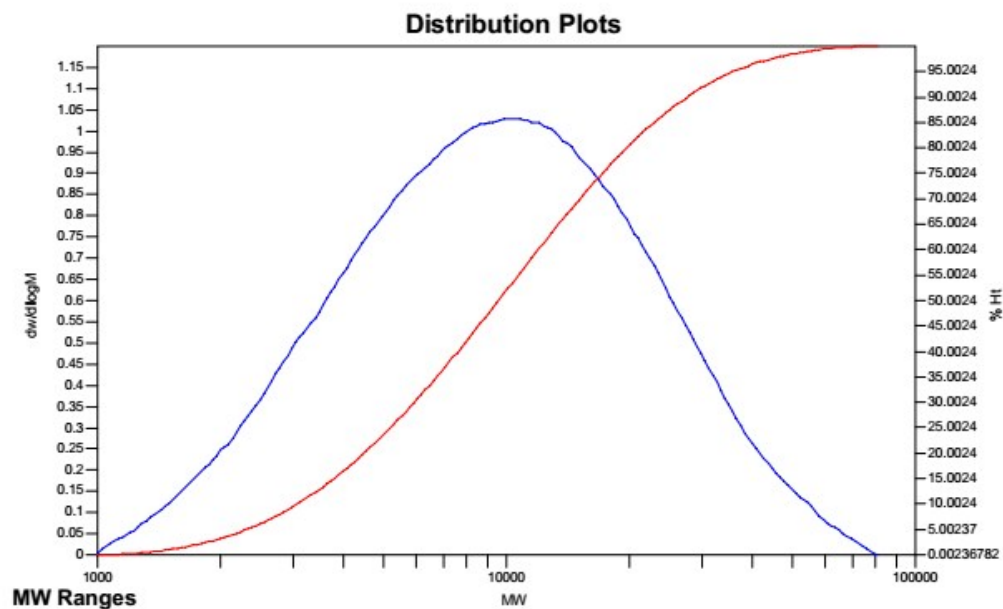

Entry 4 of Table S3

MW Averages

|           |             |            |           |
|-----------|-------------|------------|-----------|
| Mp: 12029 | Mn: 6678    | Mv: 11989  | Mw: 13127 |
| Mz: 22059 | Mz+1: 31052 | PD: 1.9657 |           |

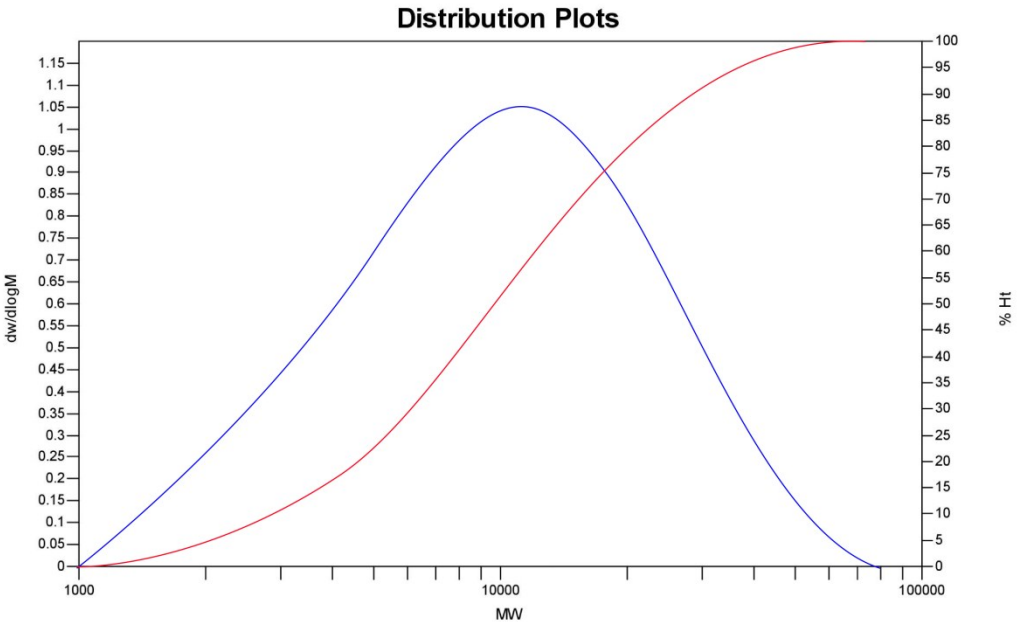

Supplement: c9py00577c1.pdf [file c9py00577c1.pdf]
